# Supplementary material for: Discovery of a SHP2 Degrader with In Vivo Anti-Tumor Activity
Source: MDPI journal article supplement (doi:10.3390/molecules28196947), 2023-10-06

## Discovery of a SHP2 degrader with in vivo anti-tumor activity

Jinmin Miao<sup>1</sup>, Yunpeng Bai<sup>1</sup>, Yiming Miao<sup>1</sup>, Zihan Qu<sup>2</sup>, Jiajun Dong<sup>1</sup>, Ruo-Yu Zhang<sup>1</sup>, Devesh Aggarwal<sup>1</sup>, Brenson A. Jassim<sup>1</sup>, Quyen Nguyen<sup>2</sup>, and Zhong-Yin Zhang<sup>1,2,3,4\*</sup>

<sup>1</sup>Department of Medicinal Chemistry and Molecular Pharmacology, <sup>2</sup>Department of Chemistry, <sup>3</sup>Institute for Cancer Research, and <sup>4</sup>Institute for Drug Discovery, Purdue University, West Lafayette, IN 47907, USA,

\*To whom correspondence should be addressed. Email: [zhang-zy@purdue.edu](mailto:zhang-zy@purdue.edu)

## Table of Contents

|                                                                                                           |    |
|-----------------------------------------------------------------------------------------------------------|----|
| 1. Figure S1. Western blots of degradation assay for PROTAC screening -----                               | 3  |
| 2. Figure S2. <sup>1</sup> H NMR spectra of intermediate <b>6</b> -----                                   | 4  |
| 3. Figure S3. <sup>13</sup> C NMR spectra of intermediate <b>6</b> -----                                  | 4  |
| 4. Figure S4. <sup>1</sup> H NMR spectra of intermediate <b>10</b> -----                                  | 5  |
| 5. Figure S5. <sup>13</sup> C NMR spectra of intermediate <b>10</b> -----                                 | 5  |
| 6. Figure S6. <sup>1</sup> H NMR spectra of intermediate <b>L11</b> -----                                 | 6  |
| 7. Figure S7. <sup>1</sup> H NMR spectra of intermediate <b>L11</b> -----                                 | 6  |
| 8. Figure S8. <sup>1</sup> H NMR spectra of PROTAC <b>P9</b> -----                                        | 7  |
| 9. Figure S9. <sup>13</sup> C NMR spectra of PROTAC <b>P9</b> -----                                       | 7  |
| 10. Scheme S1. Decomposition of CRBN-based PROTACs in the presence of water -----                         | 8  |
| 11. Table S1. Enzymatic IC <sub>50</sub> s of first generation SHP2 PROTACs against full length SHP2----- | 8  |
| 12. Table S2. Enzymatic IC <sub>50</sub> s of second generation SHP2 PROTACs against full length SHP2--   | 9  |
| 13. Table S3. Enzymatic IC <sub>50</sub> s of <b>P9</b> for a panel of 15 PTPs -----                      | 9  |
| 14. Table S4. Plasma concentrations of <b>P9</b> (μM) in pharmacokinetic studies -----                    | 10 |
| 15. Table S5. Pharmacokinetic study data -----                                                            | 10 |
| 16. Original images of unprocessed Western blots-----                                                     | 11 |

## Supplemental Figures, Schemes, and Tables:

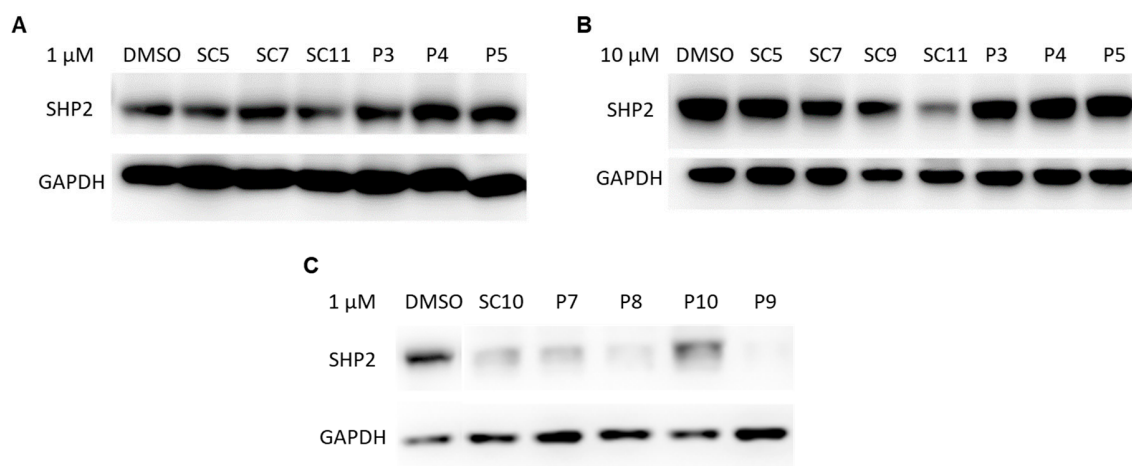

**Figure S1. Western blots of degradation assay for PROTAC screening.** (A) Degradation assay of compounds in Table 1 at 1  $\mu$ M for 16 hours in HEK293 cells. (B) Degradation assay of compounds in Table 1 at 10  $\mu$ M for 16 hours in HEK293 cells. (C) Degradation assay of compounds in Table 2 at 1  $\mu$ M for 16 hours in HEK293 cells.

Figure S2.  $^1\text{H}$  NMR spectra of intermediate 6

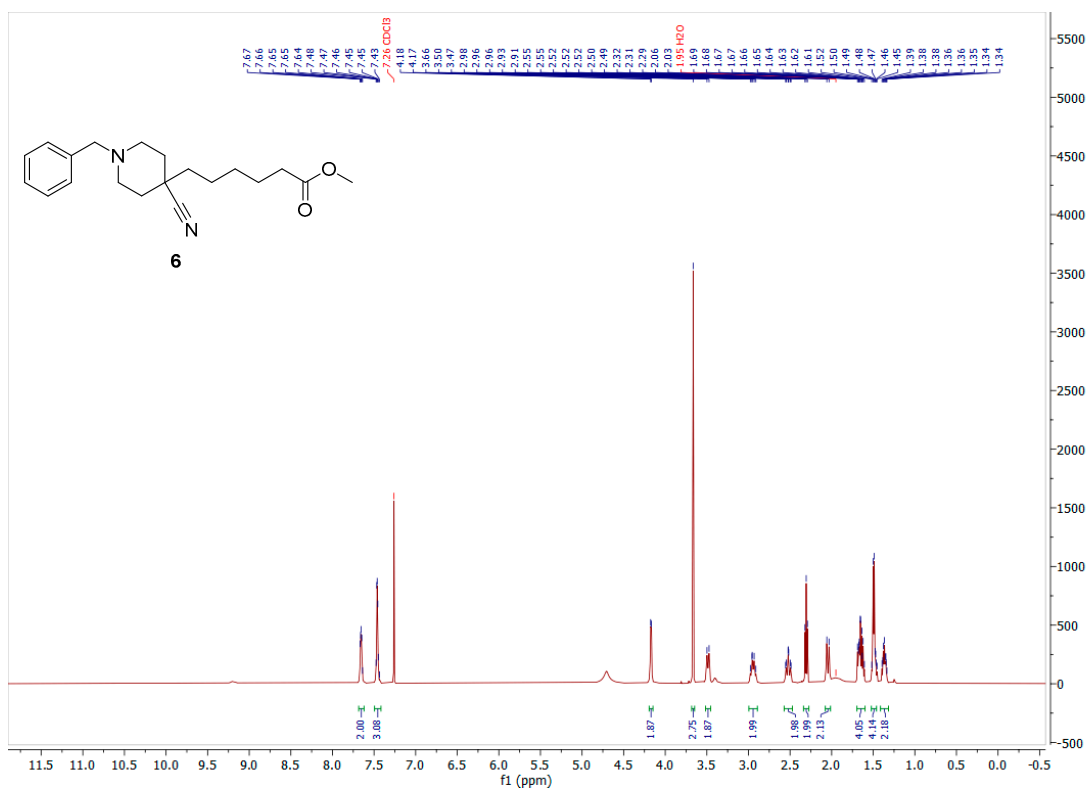

Figure S3.  $^{13}\text{C}$  NMR spectra of intermediate 6

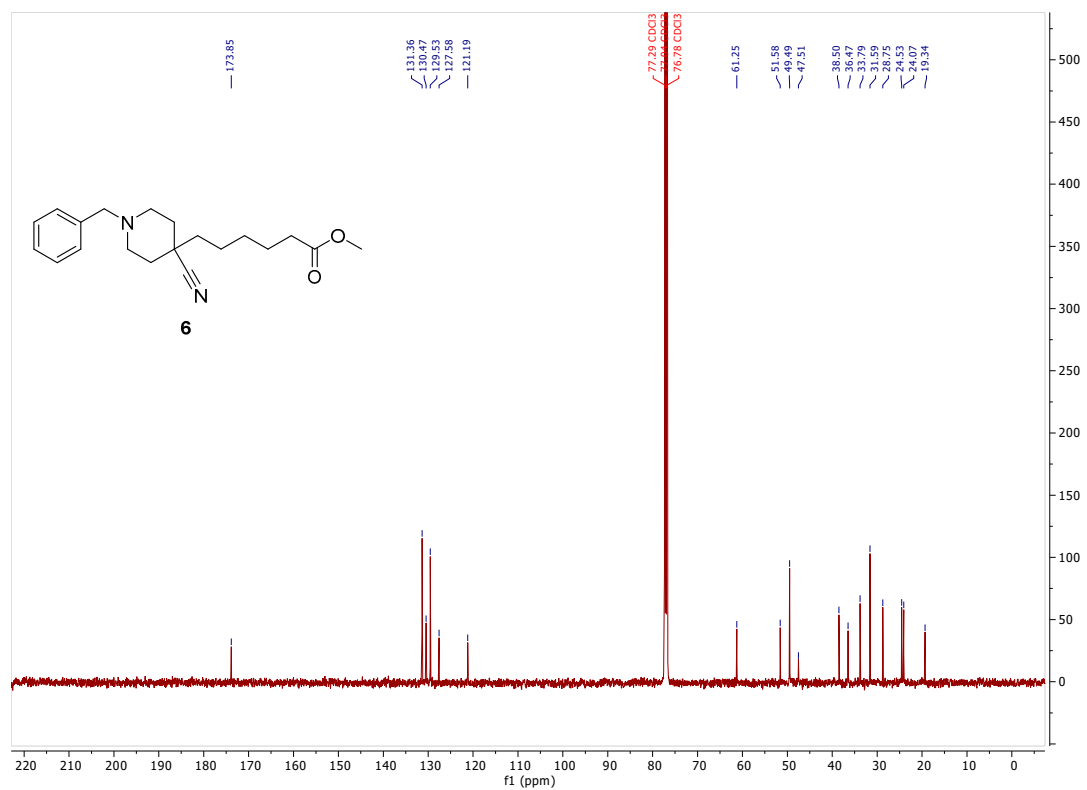

Figure S4.  $^1\text{H}$  NMR spectra of intermediate 10

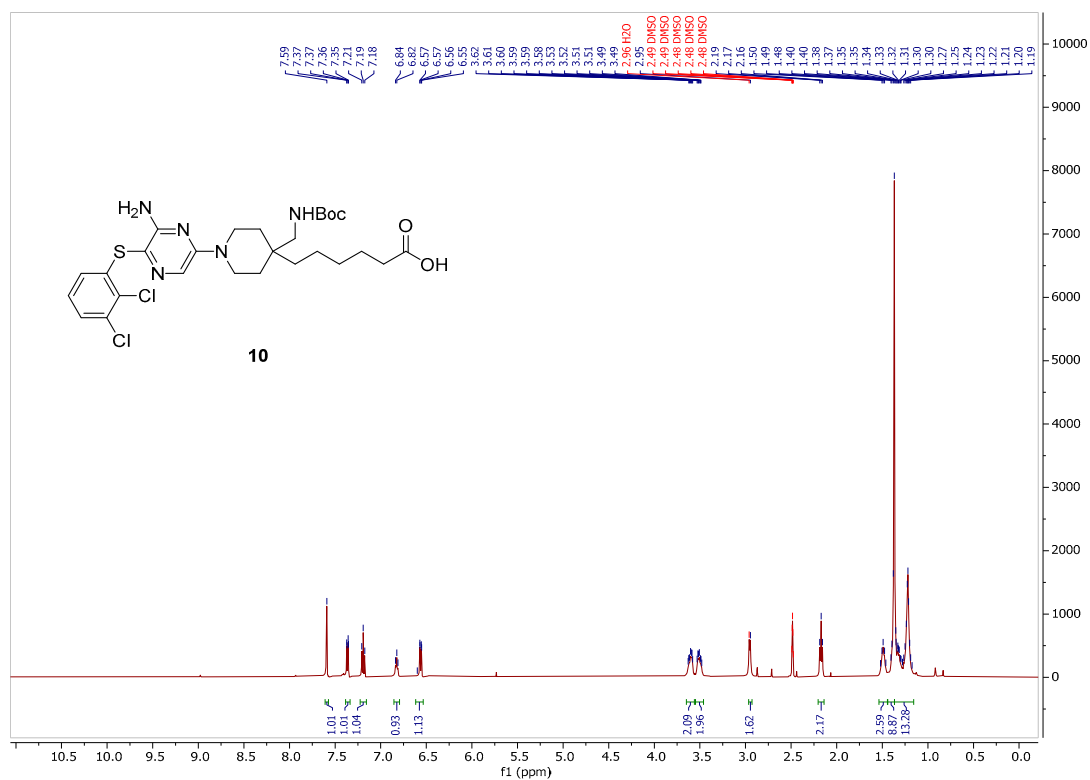

Figure S5.  $^{13}\text{C}$  NMR spectra of intermediate 10

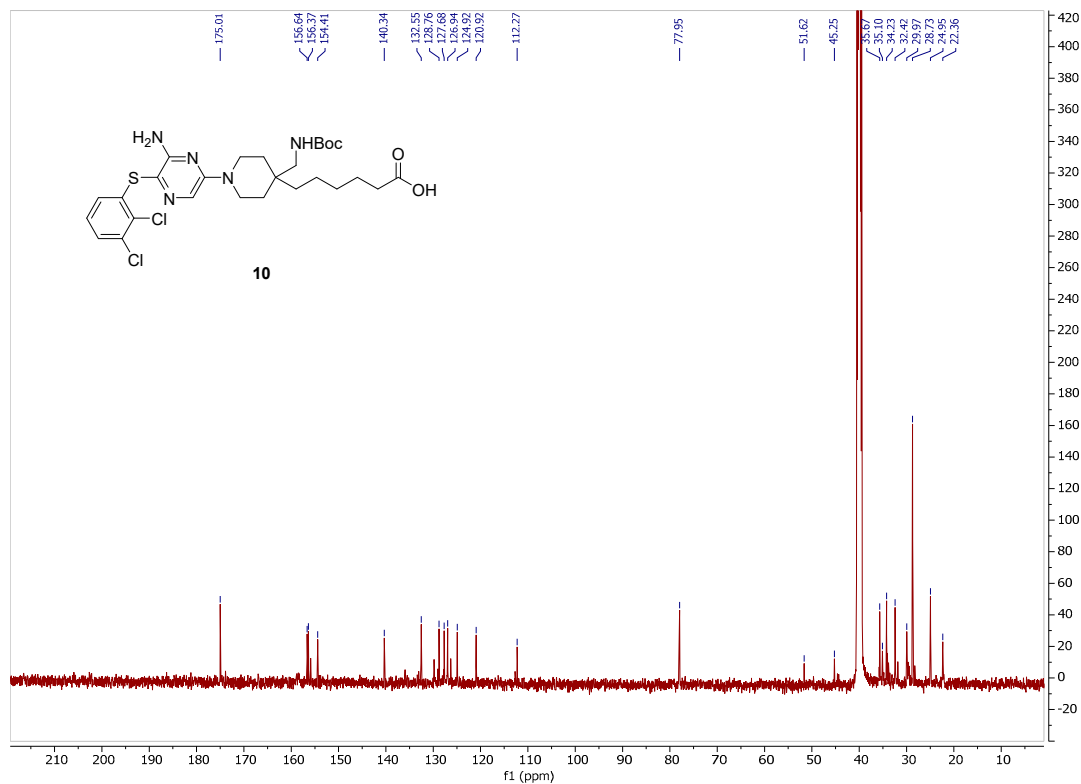

Figure S6. <sup>1</sup>H NMR spectra of intermediate L11

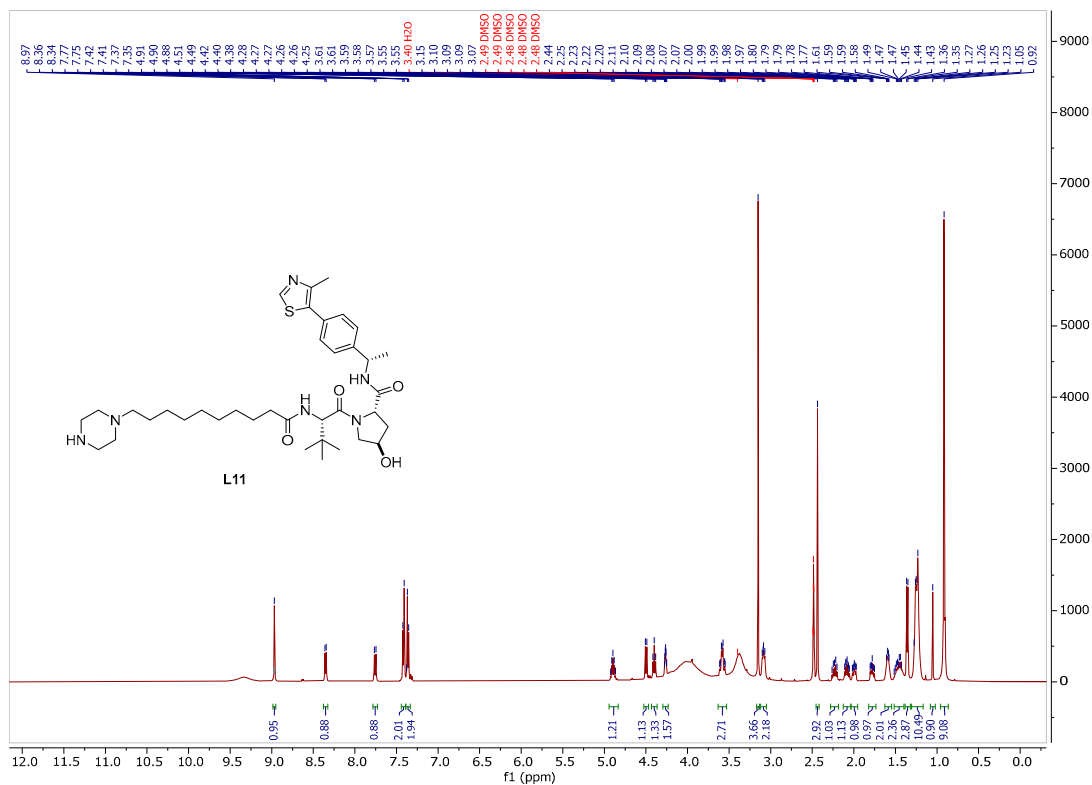

Figure S7. <sup>13</sup>C NMR spectra of intermediate L11

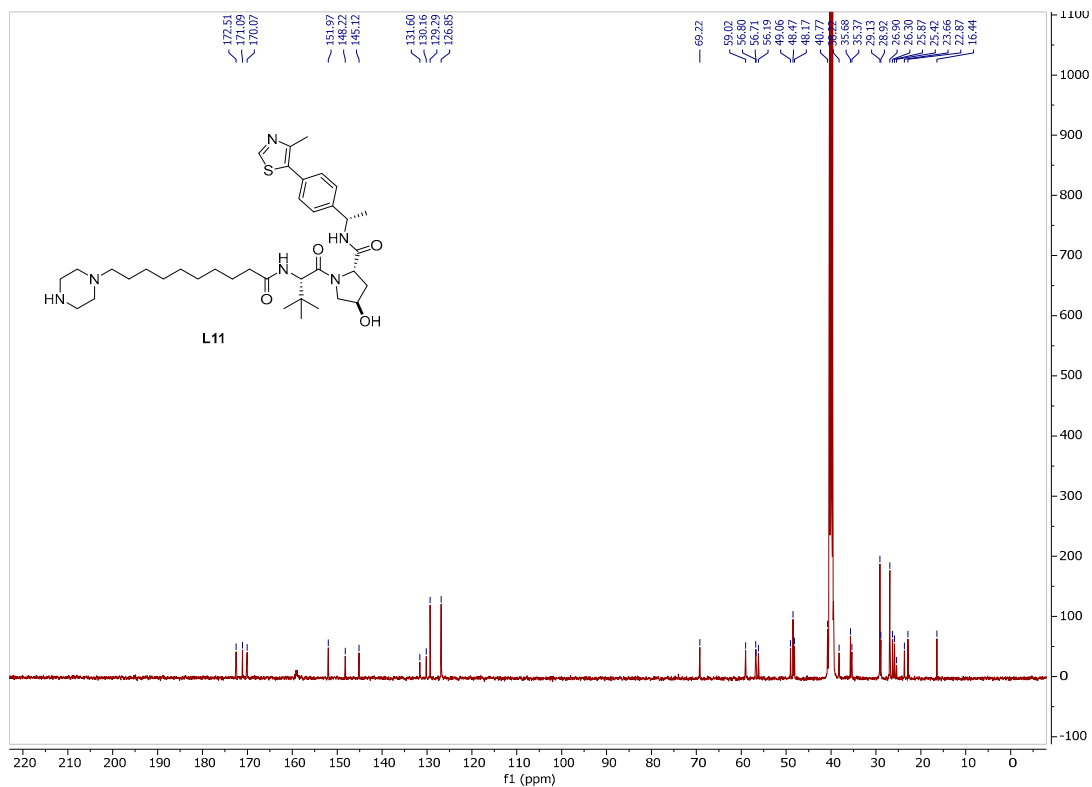

Figure S8.  $^1\text{H}$  NMR spectra of PROTAC P9

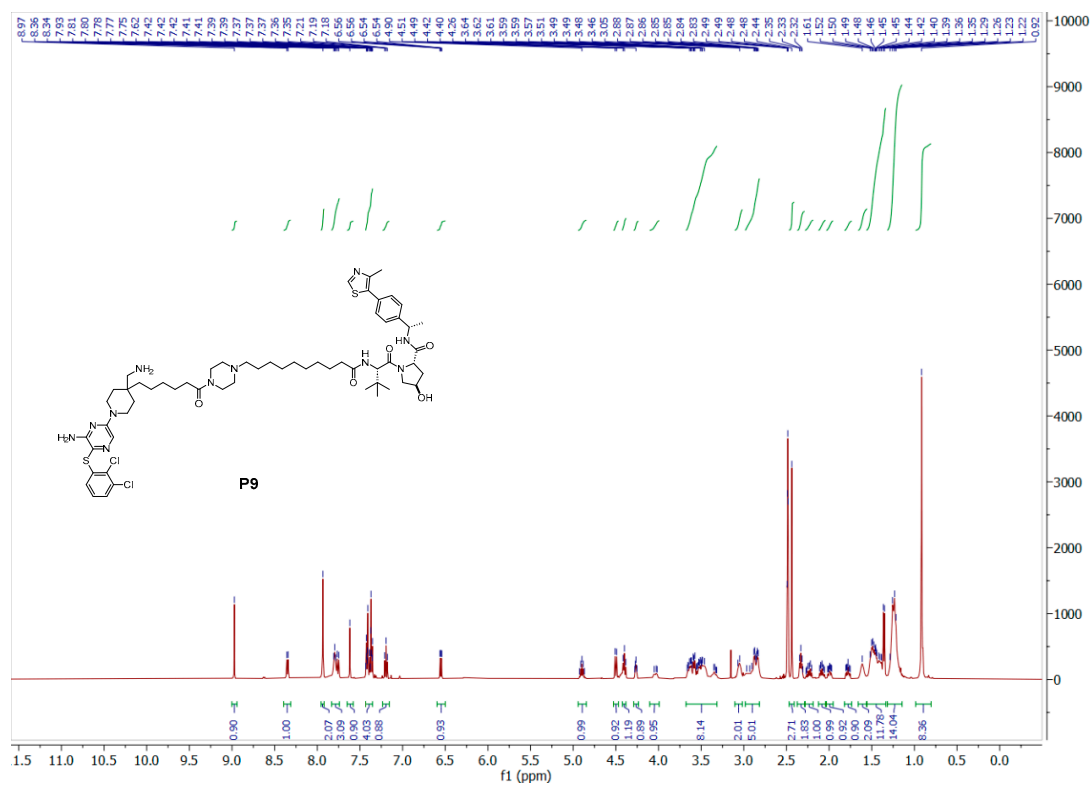

Figure S9.  $^{13}\text{C}$  NMR spectra of PROTAC P9

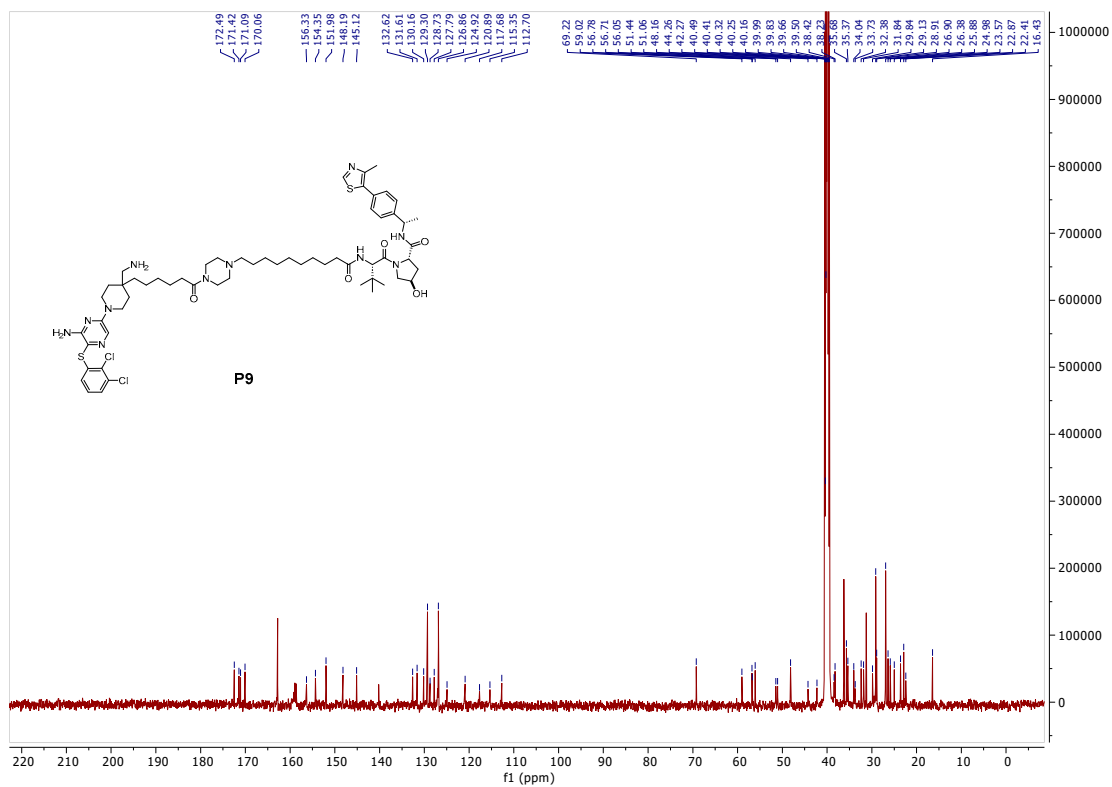

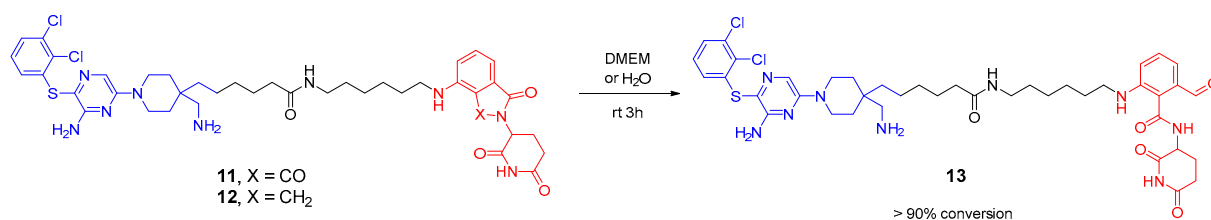

**Scheme S1. Decomposition of CRBN-based PROTACs in the presence of water.** 10  $\mu$ M compound **11** or **12** was incubated in DMEM media or water for 3 hours. The final concentrations of the compounds at the endpoint were quantified by LCMS.

**Table S1. Enzymatic IC<sub>50</sub>s of first generation SHP2 PROTACs against full length SHP2**

| Compound ID | Linker Structure | Linker Length (atom) | SHP2 IC <sub>50</sub> (nM) |
|-------------|------------------|----------------------|----------------------------|
| SC5         |                  | 6                    | 138.6 $\pm$ 10.4           |
| SC7         |                  | 8                    | 124.2 $\pm$ 21.6           |
| SC9         |                  | 10                   | 131.9 $\pm$ 8.7            |
| SC11        |                  | 12                   | 105.1 $\pm$ 15.6           |
| P3          |                  | 12                   | 158.3 $\pm$ 26.5           |
| P4          |                  | 15                   | 155.7 $\pm$ 15.8           |
| P5          |                  | 18                   | 166.4 $\pm$ 11.9           |



**Table S2. Enzymatic IC<sub>50</sub>s of second generation SHP2 PROTACs against full length SHP2**

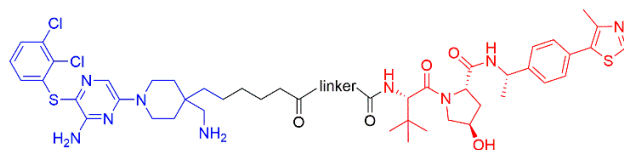

| Compound ID | Linker Structure | Linker Length (atom) | SHP2 IC <sub>50</sub> (nM) |
|-------------|------------------|----------------------|----------------------------|
| SC10        |                  | 11                   | 122.3 ± 19.1               |
| P7          |                  | 11                   | 119.2 ± 25.4               |
| P8          |                  | 12                   | 103.9 ± 9.3                |
| P9          |                  | 13                   | 95.0 ± 3.4                 |
| P10         |                  | 14                   | 110.8 ± 8.2                |

**Table S3. Enzymatic IC<sub>50</sub>s of P9 for a panel of 15 PTPs**

| PTP      | IC <sub>50</sub> μM | Fold selectivity |
|----------|---------------------|------------------|
| SHP2     | 0.095 ± 0.003       | 1                |
| SHP1     | >10                 | >105             |
| PTP1B    | >10                 | >105             |
| TC-PTP   | >10                 | >105             |
| LYP      | >10                 | >105             |
| PTP-MEG2 | >10                 | >105             |
| HePTP    | >10                 | >105             |
| Laforin  | >10                 | >105             |
| STEP     | >10                 | >105             |
| LMW-PTP  | >10                 | >105             |
| CDC-14A  | >10                 | >105             |
| CD45     | >10                 | >105             |
| FAP-1    | >10                 | >105             |
| VHR      | >10                 | >105             |
| PTP-α    | >10                 | >105             |

**Table S4. Plasma concentrations of P9 ( $\mu\text{M}$ ) in pharmacokinetic studies**

| Time (h) | 25 mg/kg<br>P9 | 25 mg/kg<br>P9 | 25 mg/kg<br>P9 | 50 mg/kg<br>P9 | 50 mg/kg<br>P9 | 50 mg/kg<br>P9 |
|----------|----------------|----------------|----------------|----------------|----------------|----------------|
| 0.5      | 0.56           | 0.52           | 0.75           | 1.76           | 1.82           | 1.96           |
| 1        | 1.02           | 1.2            | 1.32           | 2.51           | 2.7            | 2.55           |
| 2        | 0.92           | 1.09           | 0.93           | 1.66           | 1.76           | 1.7            |
| 3        | 0.55           | 0.62           | 0.59           | 1.03           | 1.22           | 1.15           |
| 6        | 0.36           | 0.41           | 0.39           | 0.55           | 0.7            | 0.68           |
| 24       | 0.13           | 0.18           | 0.06           | 0.16           | 0.24           | 0.1            |

**Table S5. Pharmacokinetic analysis of P9**

| Dose     | $t_{1/2}$ (h)   | $C_{\max}$ ( $\mu\text{M}$ ) | $T_{\max}$ (h) | AUC ( $\mu\text{M}\cdot\text{h}$ ) |
|----------|-----------------|------------------------------|----------------|------------------------------------|
| 25 mg/kg | $3.71 \pm 0.72$ | $1.18 \pm 0.13$              | 2              | $8.51 \pm 0.60$                    |
| 50 mg/kg | $3.01 \pm 0.48$ | $2.51 \pm 0.19$              | 2              | $15.09 \pm 0.99$                   |

## Original images of unprocessed Western blots

Figure 3A

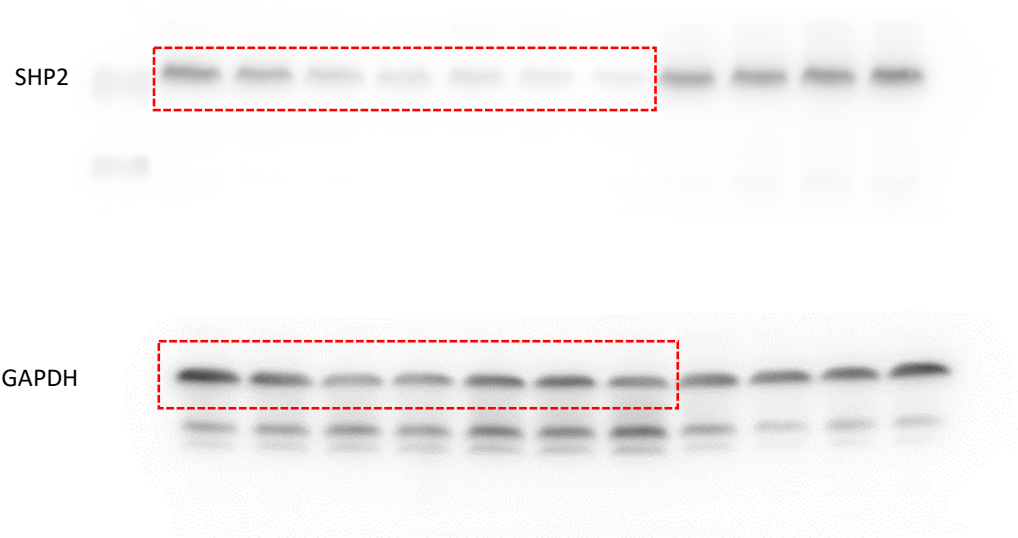

Figure 3B

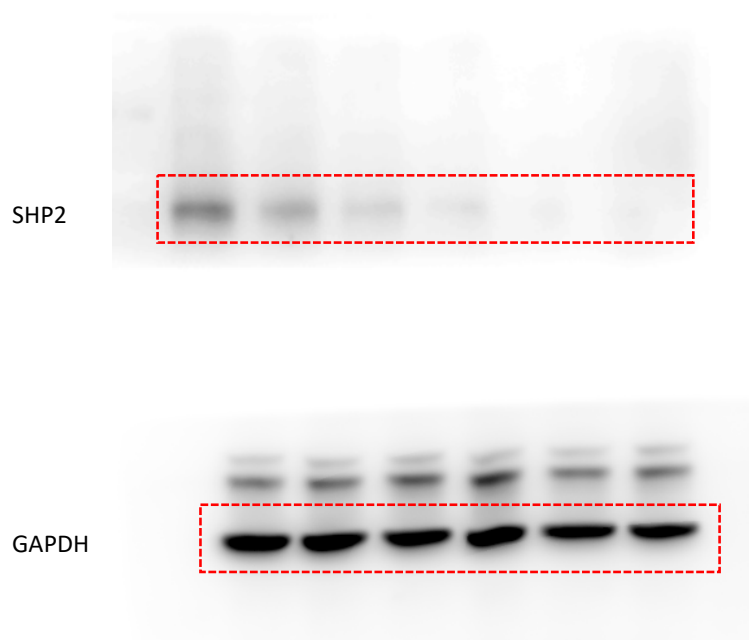

**Figure 3C**

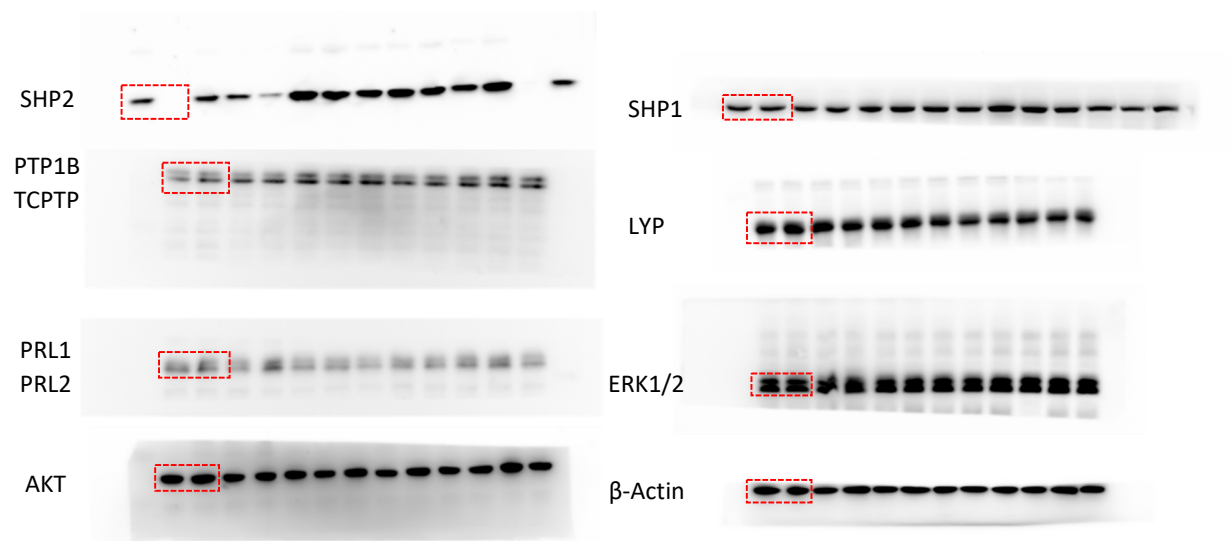

**Figure 3D**

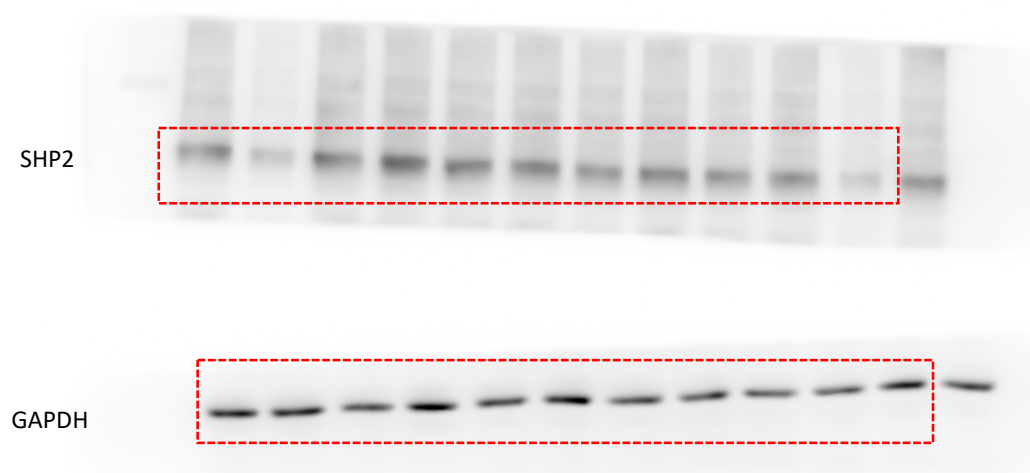

**Figure 4A**

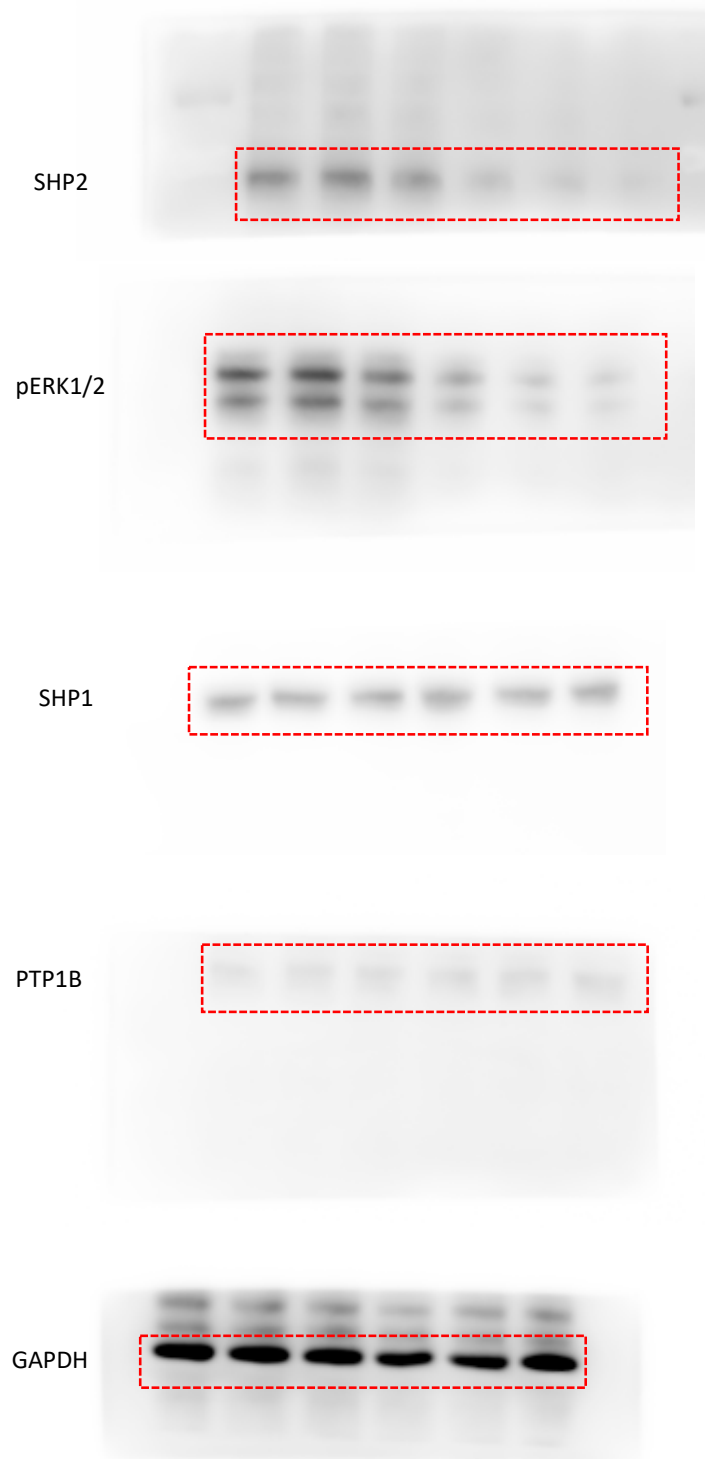

**Figure 5D**

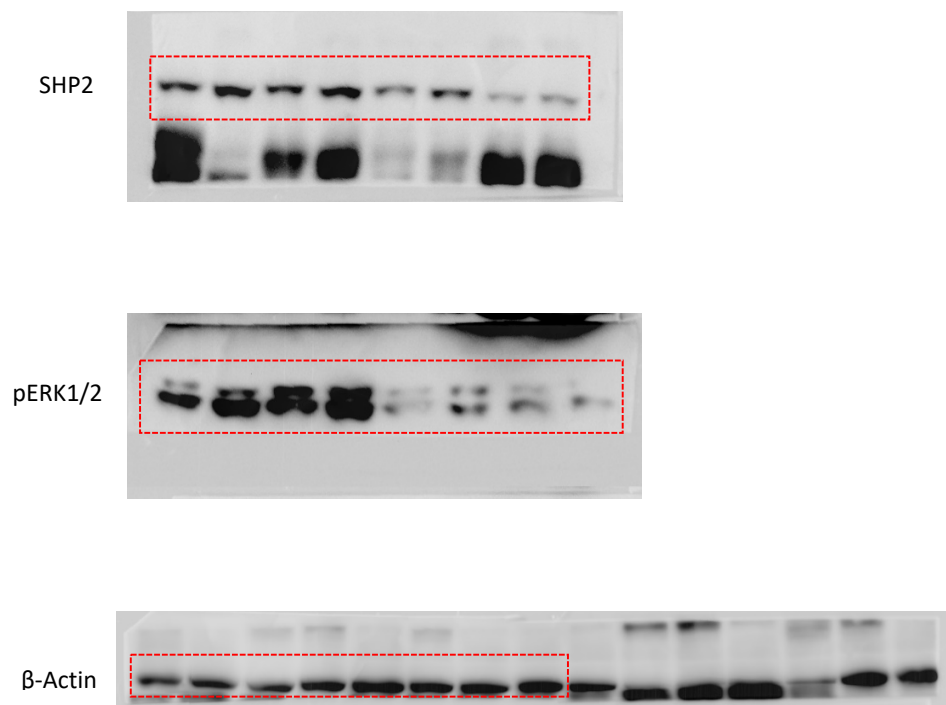

**Figure S1A**

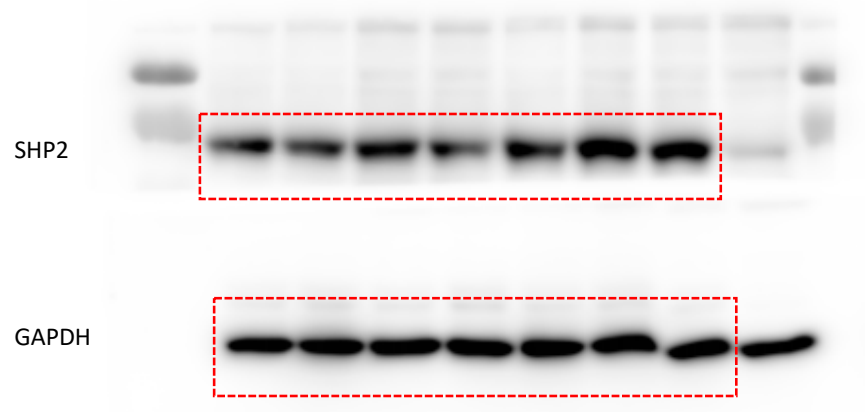

**Figure S1B**

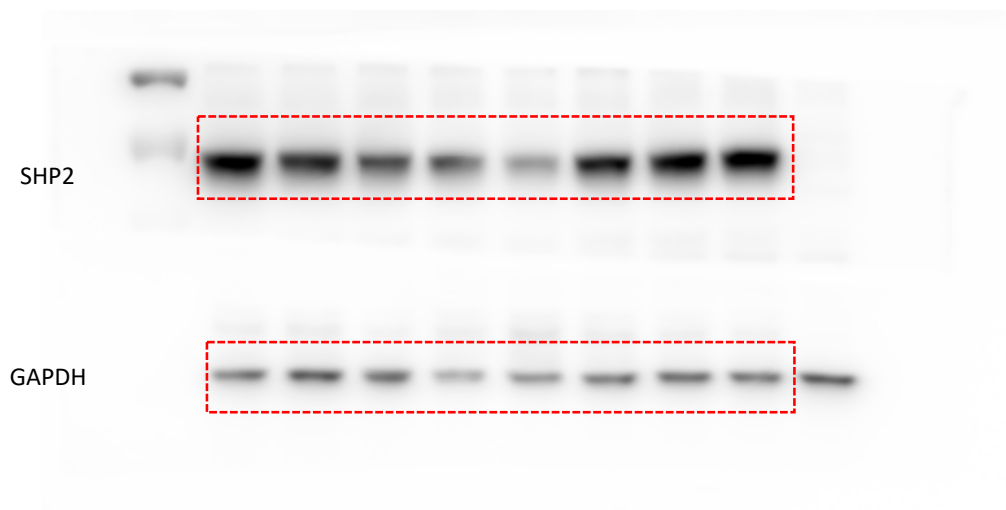

**Figure S1C**

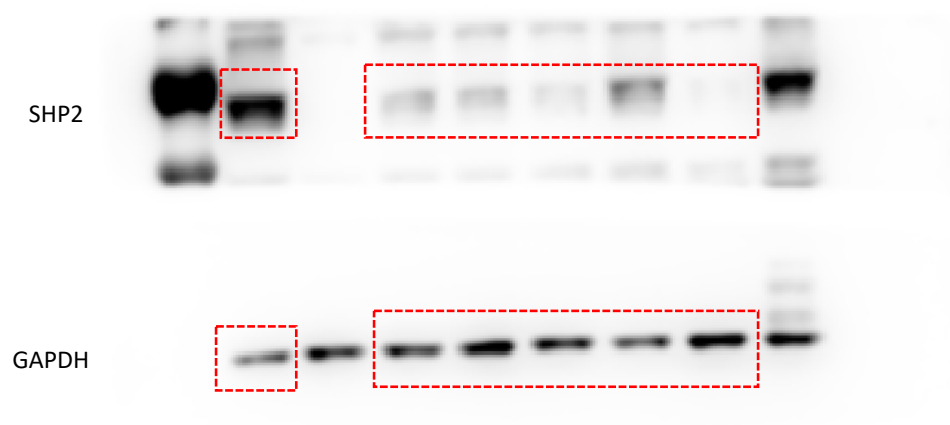

Supplement: s1 [file s1]
